# Supplementary material
Source: PubMed Central journal article supplement (PMC3103643)

## Supporting Information

### **Cytotoxic and NF- $\kappa$ B Inhibitory Constituents of the Stems of *Cratoxylum cochinchinense* and Their Semi-synthetic Analogues**

Yulin Ren,<sup>†</sup> Susan Matthew,<sup>†,‡</sup> Daniel D. Lantvit,<sup>§</sup> Tran Ngoc Ninh,<sup>⊥</sup> Heebyung Chai,<sup>†</sup> James R. Fuchs,<sup>†</sup> Djaja D. Soejarto,<sup>§</sup> Esperanza J. Carcache de Blanco,<sup>†,‡</sup> Steven M. Swanson,<sup>§</sup> and A. Douglas Kinghorn<sup>\*,†</sup>

*Divisions of Medicinal Chemistry and Pharmacognosy and Pharmacy Practice and Administration, College of Pharmacy, The Ohio State University, Columbus, Ohio 43210, Program for Collaborative Research in the Pharmaceutical Sciences and Department of Medicinal Chemistry and Pharmacognosy, College of Pharmacy, University of Illinois at Chicago, Chicago, Illinois 60612, and Institute of Ecology and Biological Resources, Vietnamese Academy of Science and Technology, Hoang Quoc Viet, Cau Giay, Hanoi, Vietnam*

\* To whom correspondence should be addressed. Tel.: +1 614 247 8094. Fax: +1 614 247 8081.

E-mail: [kinghorn.4@osu.edu](mailto:kinghorn.4@osu.edu)

<sup>†</sup> Division of Medicinal Chemistry and Pharmacognosy, College of Pharmacy, The Ohio State University.

<sup>‡</sup> Division of Pharmacy Practice and Administration, College of Pharmacy, The Ohio State University.

<sup>§</sup> University of Illinois at Chicago.

<sup>⊥</sup> Institute of Ecology and Biological Resources, Vietnam.

## Table of Contents

**Figures S1-S8.** MS and  $^1\text{H}$  and  $^{13}\text{C}$  NMR spectra of compounds **1**, **2**, **10**, **13**, **16-19**.

**Scheme S1.** Acetylation of  $\alpha$ -mangostin (**3**) and cochinchinone A (**6**).

**Scheme S2.** Methylation of  $\alpha$ -mangostin (**3**) and cochinchinone A (**6**).

**Scheme S3.** Benzoylation of  $\alpha$ -mangostin (**3**) and cochinchinone A (**6**).

**Scheme S4.** Cyclization of  $\alpha$ -mangostin (**3**).

**Tables S1-S6.** The  $^1\text{H}$  and  $^{13}\text{C}$  NMR assignments of known xanthenes isolated or derivatized from *C. cochinchinense*.

Physical data of known xanthenes isolated or derivatized from *C. cochinchinense*.

Evaluation of 3,6-di-*O*-acetyl- $\alpha$ -mangostin (**8**) in an in vivo hollow fiber assay.

**Figure S1a.** Mass spectrum of cochinchinoxanthone (**1**) from *C. cochinchinense*

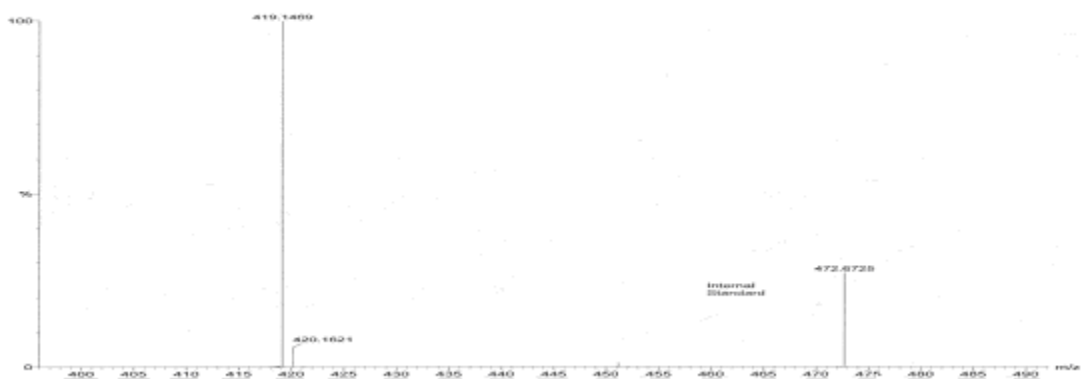

**Figure S1b.**  $^1\text{H}$  NMR spectrum of cochinchinoxanthone (**1**) from *C. cochinchinense*

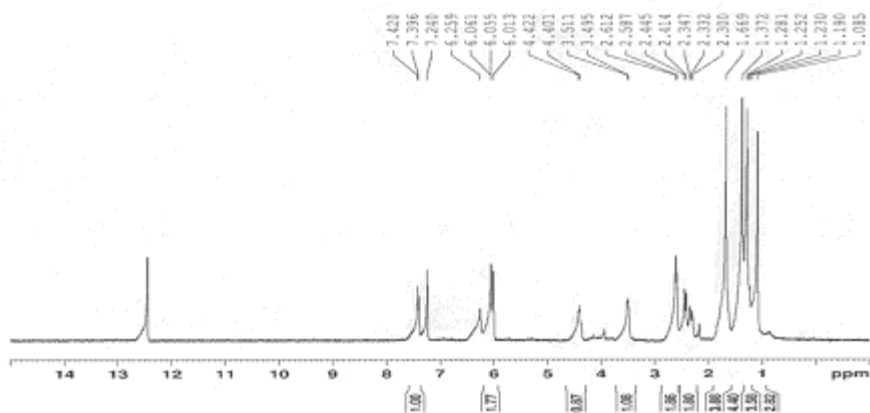

**Figure S1c.**  $^{13}\text{C}$  NMR spectrum of cochinchinoxanthone (**1**) from *C. cochinchinense*

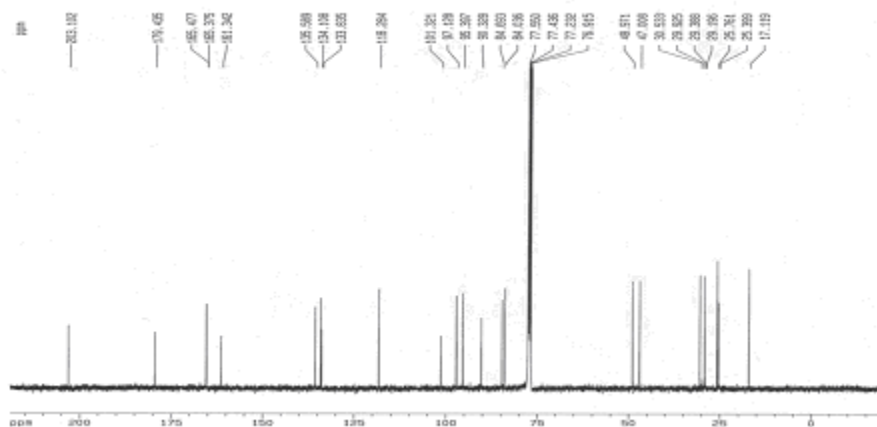

**Figure S2a.** Mass spectrum of cochinensoxanthone (**2**) from *C. cochinchinense*

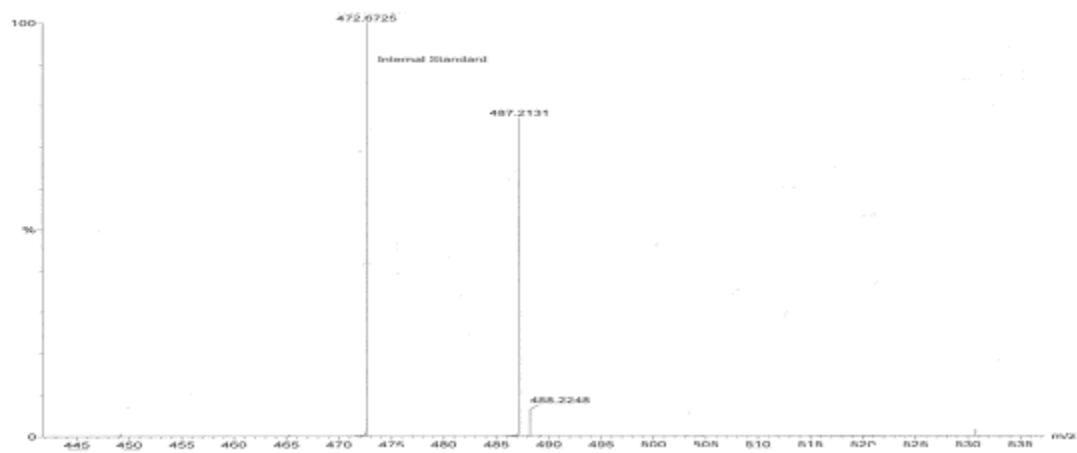

**Figure S2b.**  $^1\text{H}$  NMR spectrum of cochinensoxanthone (**2**) from *C. cochinchinense*

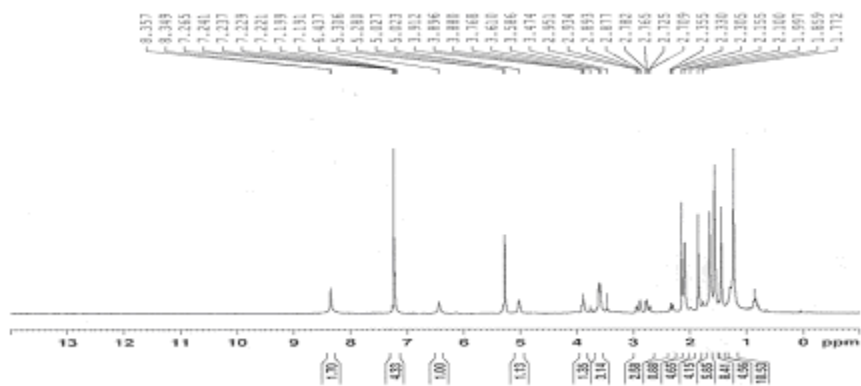

**Figure S2c.**  $^{13}\text{C}$  NMR spectrum of cochinensoxanthone (**2**) from *C. cochinchinense*

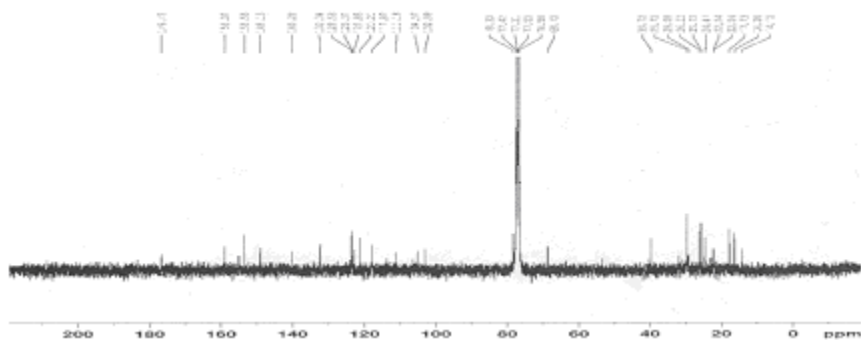

**Figure S3a.** Mass spectrum of 4-methyl-3,6-di-*O*-methyl- $\alpha$ -mangostin (**10**) from  $\alpha$ -mangostin

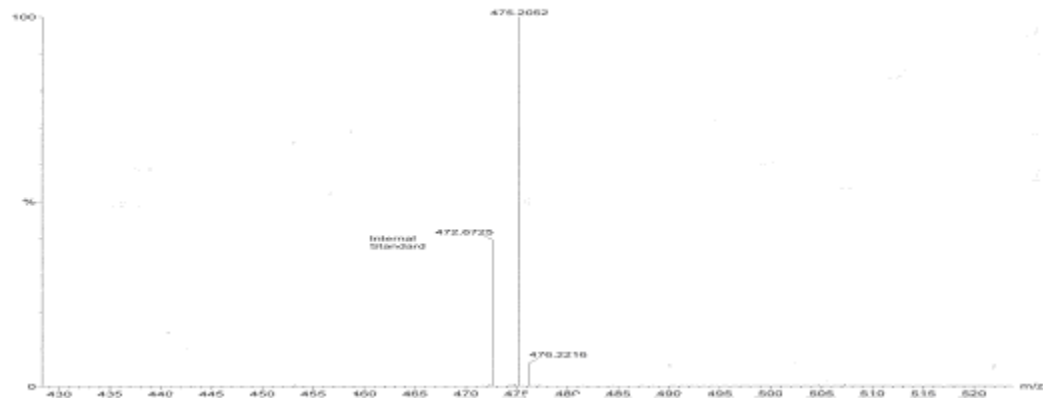

**Figure S3b.**  $^1\text{H}$  NMR spectrum of 4-methyl-3,6-di-*O*-methyl- $\alpha$ -mangostin (**10**) from  $\alpha$ -mangostin

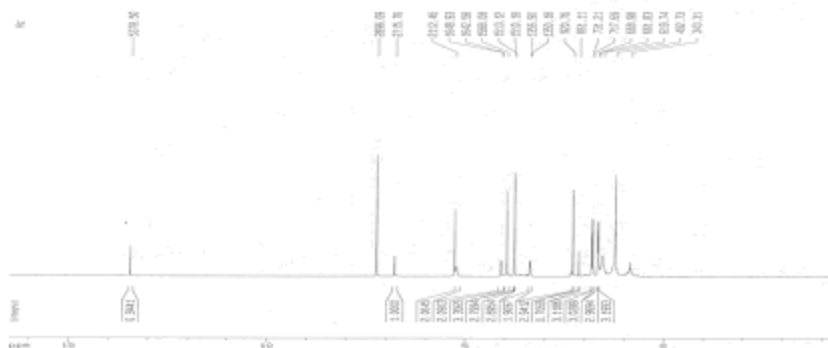

**Figure S3c.**  $^{13}\text{C}$  NMR spectrum of 4-methyl-3,6-di-*O*-methyl- $\alpha$ -mangostin (**10**) from  $\alpha$ -mangostin

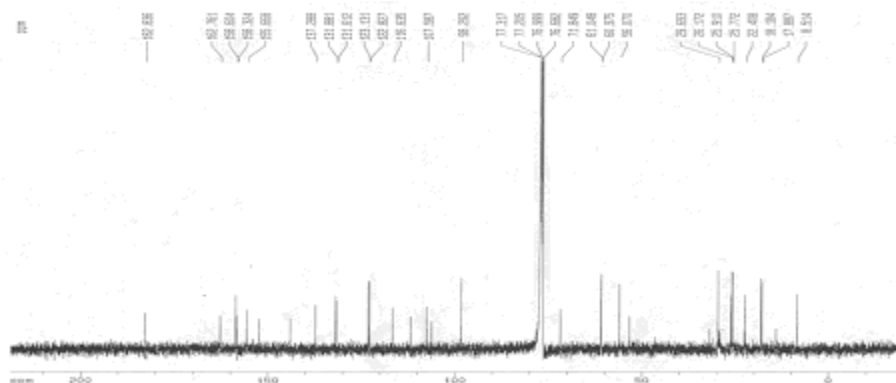





**Figure S6a.** Mass spectrum of 7-*O*-methylcochinquinone A (**17**) from cochinquinone A

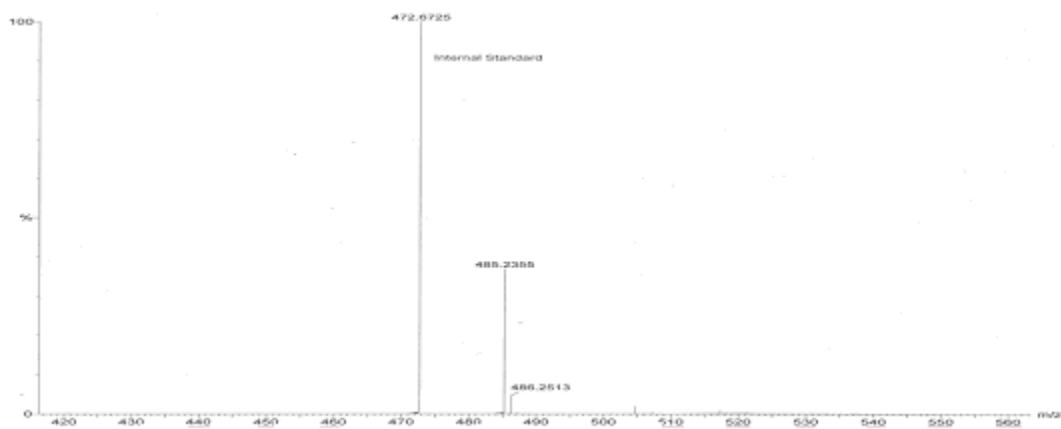

**Figure S6b.**  $^1\text{H}$  NMR spectrum of 7-*O*-methylcochinquinone A (**17**) from cochinquinone A

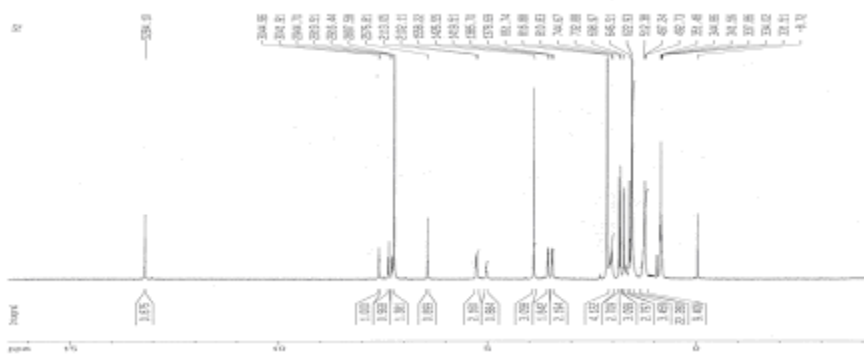

**Figure S6c.**  $^{13}\text{C}$  NMR spectrum of 7-*O*-methylcochinquinone A (**17**) from cochinquinone A

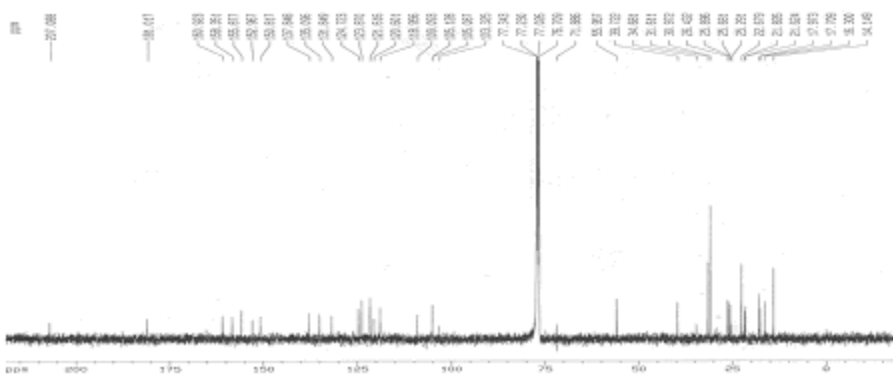



**Figure S7a.** Mass spectrum of 3,7-di-*O*-methylcochinquinone A (**18**) from cochinquinone A

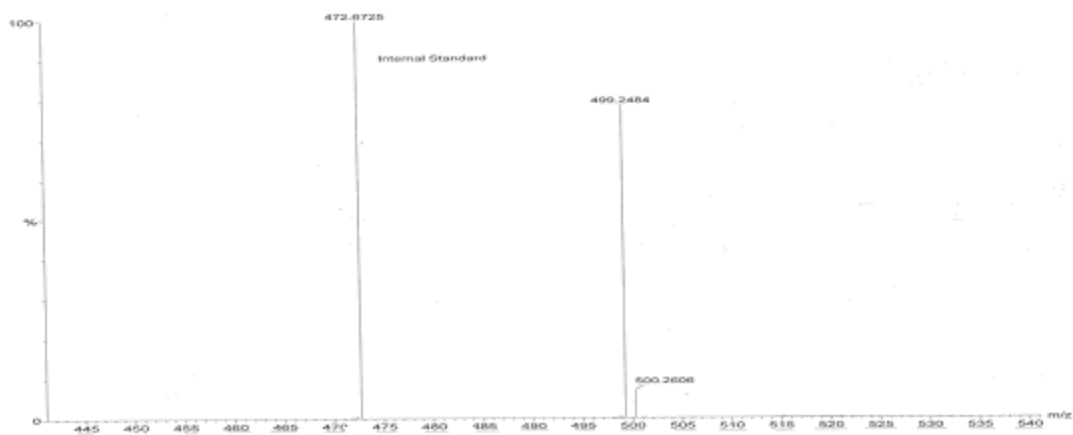

**Figure S7b.**  $^1\text{H}$  NMR spectrum of 3,7-di-*O*-methylcochinquinone A (**18**) from cochinquinone A

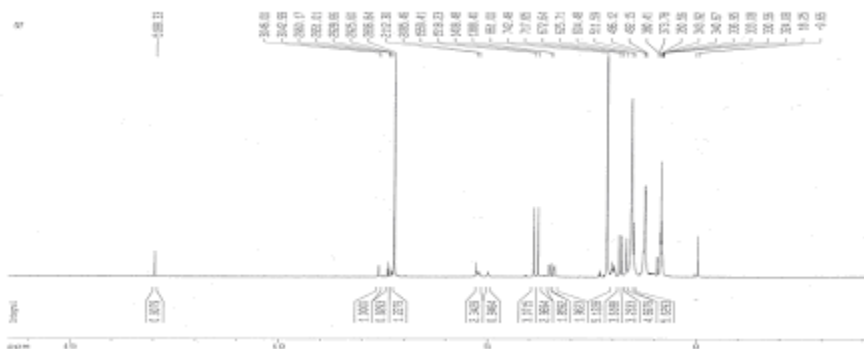

**Figure S7c.**  $^{13}\text{C}$  NMR spectrum of 3,7-di-*O*-methylcochinquinone A (**18**) from cochinquinone A

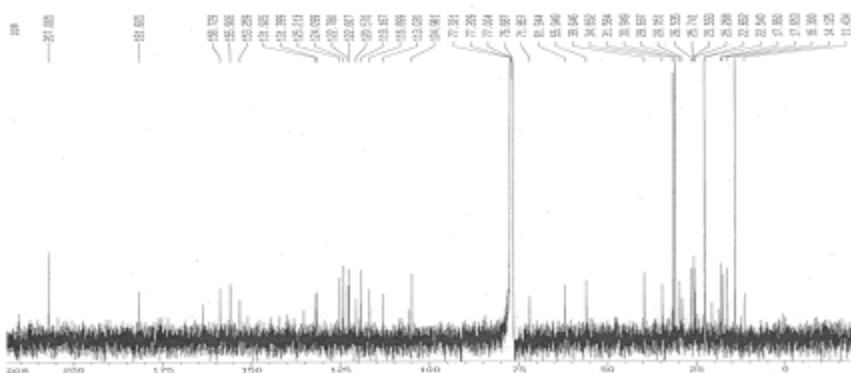



**Scheme S1.** Acetylation of  $\alpha$ -mangostin (**3**) and cochinquinone A (**6**).

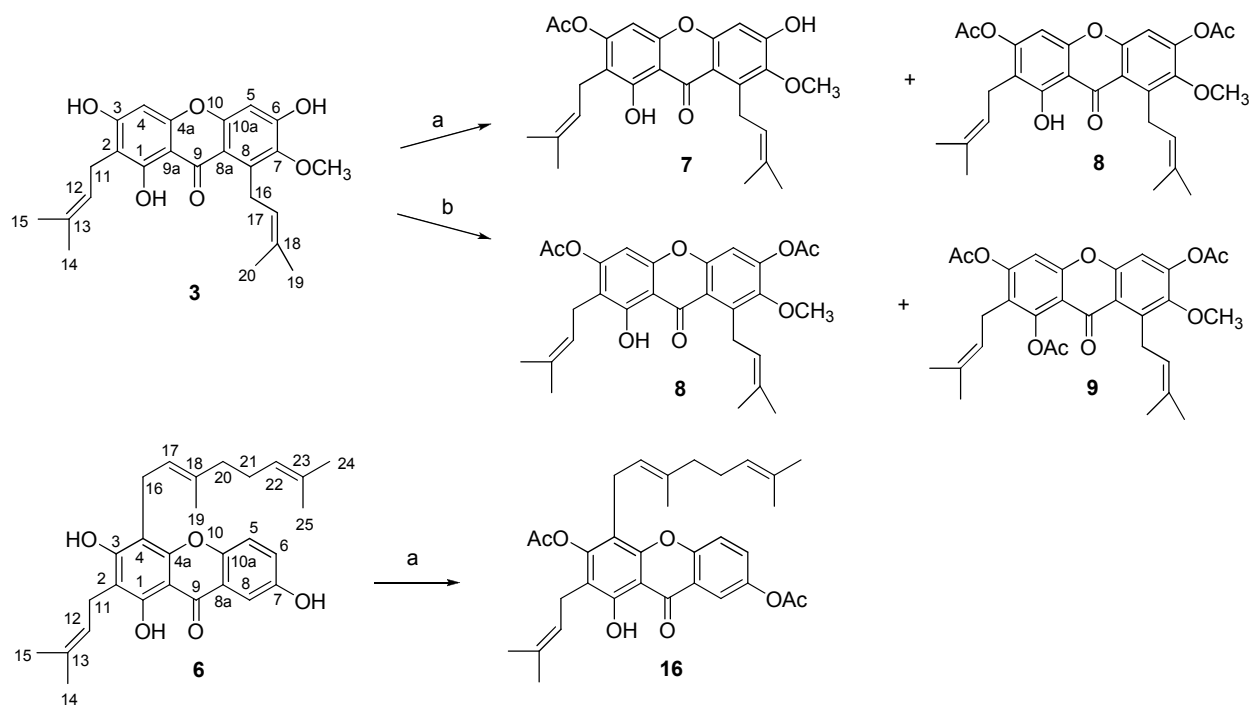

a: acetic anhydride and pyridine, 60 °C, 1 h. b: acetic anhydride and pyridine, 70 °C, 2 h.

**Scheme S2.** Methylation of  $\alpha$ -mangostin (**3**) and cochinquinone A (**6**).

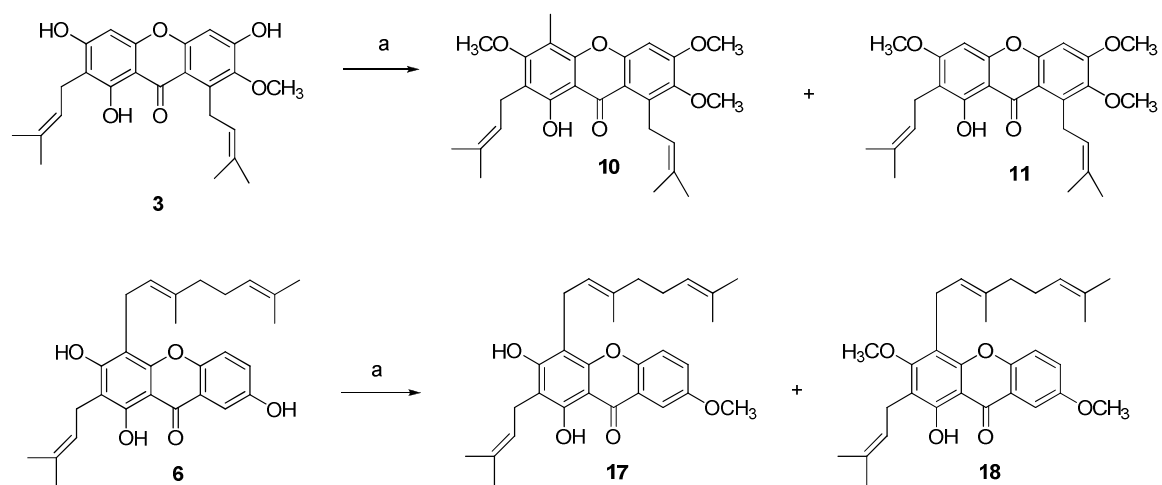

a: methyl iodide and silver oxide (1:1) in dichloromethane, reflux, 2 h.

**Scheme S3.** Benzoylation of  $\alpha$ -mangostin (**3**) and cochinchinone A (**6**).

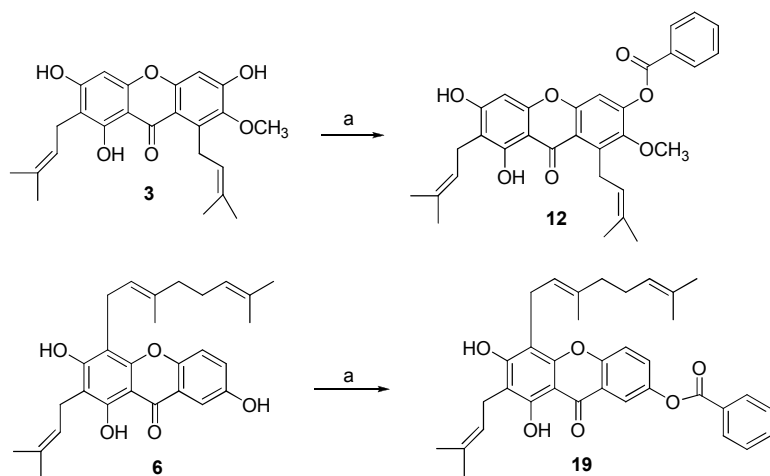

a: benzoic acid and DCC in dichloromethane, reflux, 2 h.

**Scheme S4.** Cyclization of  $\alpha$ -mangostin (**3**).

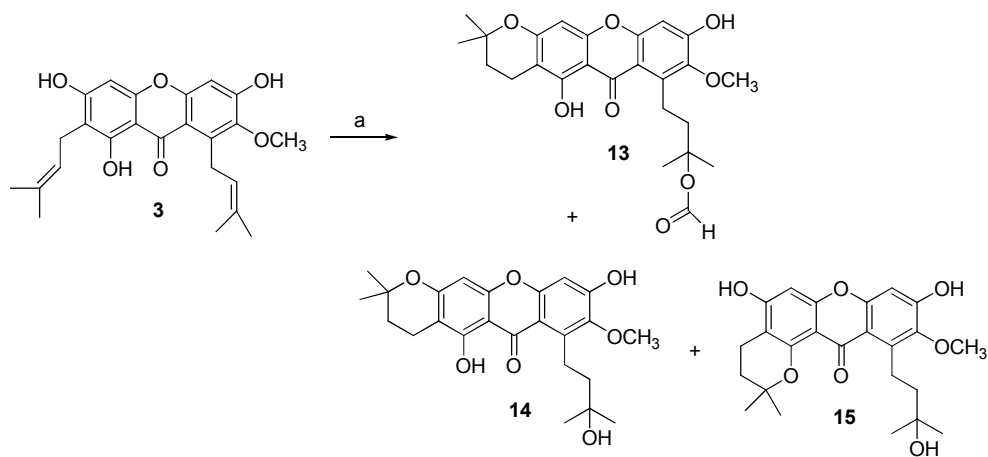

**a:** formic acid and DCC in dichloromethane, reflux, 2 h.

**Table S1.** <sup>1</sup>H NMR Spectroscopic Data of Compounds **3-7**

| position | <b>3</b> <sup>a</sup> | <b>4</b> <sup>b</sup> | <b>5</b> <sup>c</sup> | <b>6</b> <sup>c</sup> | <b>7</b> <sup>c</sup> |
|----------|-----------------------|-----------------------|-----------------------|-----------------------|-----------------------|
| 4        | 6.28 d (1.2)          | 6.37 s                |                       |                       | 6.59 s                |
| 5        | 6.82 d (1.2)          | 6.81 s                | 7.37 d (9.0)          | 7.27 d (9.0)          | 6.82 s                |
| 6        |                       |                       | 7.24 dd (3.0, 9.0)    | 7.22 dd (2.4, 9.0)    |                       |
| 8        |                       |                       | 7.59 d (3.0)          | 7.61 d (2.4)          |                       |
| 11       | 3.45 d (7.2)          | 3.36 d (7.1)          | 3.47 d (7.2)          | 3.46 d (6.5)          | 3.03 d (7.0)          |
| 12       | 5.29 t (7.2)          | 5.33 m                | 5.26 t (7.2)          | 5.31 t (6.5)          | 5.23 m                |
| 13       |                       |                       |                       |                       |                       |
| 14       | 1.76 s                | 1.64 s                | 1.76 s                | 1.76 s                | 1.67 s                |
| 15       | 1.83 s                | <sup>i</sup> 1.78 s   | 1.84 s                | 1.84 s                | 1.76 s                |
| 16       | 4.09 d (6.3)          | 4.20 d (6.7)          | 3.54 d (6.9)          | 3.55 d (6.5)          | 4.07 d (6.3)          |
| 17       | 5.25 t (6.3)          | 5.33 m                | 5.28 t (6.9)          | 5.26 t (6.5)          | 5.23 m                |
| 19       | 1.68 s                | 1.64 s                | 1.72 s                | 1.87 s                | 1.67 s                |
| 20       | 1.81 s                | <sup>i</sup> 1.84 s   | 1.87 s                | 2.09 m                | 1.81 s                |
| 21       |                       |                       |                       | 2.09 m                |                       |
| 22       |                       |                       |                       | 5.04 t (6.5)          |                       |
| 24       |                       |                       |                       | 1.63 s                |                       |
| 25       |                       |                       |                       | 1.57 s                |                       |
| OMe-7    | 3.79 s                |                       |                       |                       | 3.79 s                |
| OAc-3    |                       |                       |                       |                       | 2.36 s                |
| OH-1     | 13.78 s               | 13.97 s               | 13.15 s               | 12.98 s               | 13.60 s               |
| OH-3     | 6.13 s                |                       |                       |                       |                       |
| OH-6     | 6.29 s                |                       |                       |                       | 6.34 s                |
| OH-7     |                       |                       | 6.44 s                |                       |                       |

<sup>a</sup>Data ( $\delta$ ) measured in acetone-d<sub>6</sub> at 300 MHz. <sup>b</sup>Data ( $\delta$ ) measured in acetone-d<sub>6</sub> at 400 MHz.

<sup>c</sup>Data ( $\delta$ ) measured in CDCl<sub>3</sub> at 300 MHz. s = singlet, d = doublet, t = triplet, m = multiplet, dd = double doublet. *J* values presented in Hz and omitted if the signals overlapped as multiplets.

<sup>i</sup>interchangeable.

**Table S2.**  $^{13}\text{C}$  NMR Spectroscopic Data of Compounds **3-7**

| position | <b>3</b> <sup>a</sup> | <b>4</b> <sup>b</sup>              | <b>5</b> <sup>c</sup> | <b>6</b> <sup>c</sup> | <b>7</b> <sup>d</sup>           |
|----------|-----------------------|------------------------------------|-----------------------|-----------------------|---------------------------------|
| 1        | 160.7 C               | 162.8 C                            | 158.3 C               | 158.3 C               | 160.9 C                         |
| 2        | 108.4 C               | 99.4 C                             | 108.8 C               | 109.2 C               | 115.9 C                         |
| 3        | 161.6 C               | 161.8 C                            | 160.9 C               | 161.1 C               | 156.0 C                         |
| 4        | 93.3 CH               | 93.0 CH                            | 105.3 C               | 105.1 C               | 100.2 CH                        |
| 4a       | 155.1 C               | 155.8 C                            | 153.1 C               | 153.0 C               | 154.4 C                         |
| 5        | 101.6 CH              | 101.2 CH                           | 119.1 CH              | 119.0 CH              | 101.6 CH                        |
| 6        | 154.5 C               | 149.6 C                            | 123.7 CH              | 124.0 CH              | 153.6 C                         |
| 7        | 142.6 C               | 141.8 C                            | 151.8 C               | 152.3 C               | 142.7 C                         |
| 8        | 137.1 C               | 131.4 C                            | 109.3 CH              | 109.0 CH              | 137.2 C                         |
| 8a       | 112.3 C               | 110.8 C                            | 120.9 C               | 120.6 C               | 112.2 C                         |
| 9        | 182.1 C               | 183.3 C                            | 180.8 C               | 180.9 C               | 182.6 C                         |
| 9a       | 103.7 C               | 103.8 C                            | 103.3 C               | 103.2 C               | 106.8 C                         |
| 10a      | 155.8 C               | 153.6 C                            | 150.7 C               | 150.4 C               | 155.0 C                         |
| 11       | 21.5 CH <sub>2</sub>  | 22.1 CH <sub>2</sub>               | 21.7 CH <sub>2</sub>  | 21.6 CH <sub>2</sub>  | 22.3 CH <sub>2</sub>            |
| 12       | 121.4 CH              | 123.6 CH                           | 122.8 CH              | 121.6 CH              | 121.4 CH                        |
| 13       | 135.8 C               | 131.4 C                            | 135.5 C               | 135.0 C               | 132.4 C                         |
| 14       | 25.8 CH <sub>3</sub>  | <sup>i</sup> 26.1 CH <sub>3</sub>  | 25.8 CH <sub>3</sub>  | 25.8 CH <sub>3</sub>  | 25.7 CH <sub>3</sub>            |
| 15       | 18.0 CH <sub>3</sub>  | <sup>ii</sup> 18.4 CH <sub>3</sub> | 17.9 CH <sub>3</sub>  | 17.9 CH <sub>3</sub>  | 18.2 CH <sub>3</sub>            |
| 16       | 26.6 CH <sub>2</sub>  | 26.5 CH <sub>2</sub>               | 21.9 CH <sub>2</sub>  | 21.8 CH <sub>2</sub>  | 26.6 CH <sub>2</sub>            |
| 17       | 123.2 CH              | 124.6 CH                           | 122.5 CH              | 121.6 CH              | 122.8 CH                        |
| 18       | 132.1 C               | 129.1 C                            | 133.8 C               | 137.9 C               | 132.2 C                         |
| 19       | 25.8 CH <sub>3</sub>  | <sup>i</sup> 26.0 CH <sub>3</sub>  | 25.8 CH <sub>3</sub>  | 16.3 CH <sub>3</sub>  | 25.8 CH <sub>3</sub>            |
| 20       | 18.2 CH <sub>3</sub>  | <sup>ii</sup> 18.0 CH <sub>3</sub> | 17.9 CH <sub>3</sub>  | 39.7 CH <sub>2</sub>  | 17.8 CH <sub>3</sub>            |
| 21       |                       |                                    |                       | 26.4 CH <sub>2</sub>  |                                 |
| 22       |                       |                                    |                       | 123.9 CH              |                                 |
| 23       |                       |                                    |                       | 131.8 C               |                                 |
| 24       |                       |                                    |                       | 25.6 CH <sub>3</sub>  |                                 |
| 25       |                       |                                    |                       | 17.7 CH <sub>3</sub>  |                                 |
| OMe-7    | 62.1 CH <sub>3</sub>  |                                    |                       |                       | 62.1 CH <sub>3</sub>            |
| Me-4     |                       |                                    |                       |                       |                                 |
| OAc-3    |                       |                                    |                       |                       | 168.6 C<br>21.0 CH <sub>3</sub> |

<sup>a</sup>Data ( $\delta$ ) measured in acetone-d<sub>6</sub> at 75.5 MHz. <sup>b</sup>Data ( $\delta$ ) measured in acetone-d<sub>6</sub> at 100.6 MHz.

<sup>c</sup>Data ( $\delta$ ) measured in CDCl<sub>3</sub> at 75.5 MHz. <sup>d</sup>Data ( $\delta$ ) measured in CDCl<sub>3</sub> at 100.6 MHz.

<sup>i,ii</sup>interchangeable.



**Table S3.** <sup>1</sup>H NMR Spectroscopic Data of Compounds **8, 9, 11-13**

| position | <b>8</b>     | <b>9</b>     | <b>11</b>    | <b>12</b>    | <b>13</b>      |
|----------|--------------|--------------|--------------|--------------|----------------|
| 4        | 6.62 s       | 7.09 s       | 6.31 s       | 6.30 s       | 6.22 s         |
| 5        | 7.11 s       | 7.11 s       | 6.72 s       | 7.24 s       | 6.81 s         |
| 11       | 3.31 d (6.9) | 3.25 d (6.9) | 3.35 d (6.9) | 3.47 d (6.9) | 2.71 t (6.6) m |
| 12       | 5.16 m       | 5.01 t (6.9) | 5.23 m       | 5.23 m       | 1.85 t (6.6)   |
| 14       | 1.67 s       | 1.65 s       | 1.67 s       | 1.76 s       | 1.35 s         |
| 15       | 1.76 s       | 1.73 s       | 1.78 s       | 1.83 s       | 1.35 s         |
| 16       | 4.13 d (6.3) | 4.06 d (5.4) | 4.13 d (6.3) | 4.17 d (6.3) | 3.41 m         |
| 17       | 5.16 m       | 5.16 t (5.4) | 5.23 m       | 5.23 m       | 2.06 m         |
| 19       | 1.67 s       | 1.65 s       | 1.67 s       | 1.67 s       | 1.61 s         |
| 20       | 1.82 s       | 1.80 s       | 1.83 s       | 1.81 s       | 1.61 s         |
| OMe-3    |              |              | 3.89 s       |              |                |
| OMe-6    |              |              | 3.94 s       |              |                |
| OMe-7    | 3.79 s       | 3.74 s       | 3.78 s       | 3.75 s       | 3.83 s         |
| OAc      | 2.37 s       | 2.44 s       |              |              |                |
| OAc      | 2.32 s       | 2.36 s       |              |              |                |
| OAc      |              | 2.32 s       |              |              |                |
| 3'       |              |              |              | 8.24 d (7.5) |                |
| 4'       |              |              |              | 7.56 t (7.5) |                |
| 5'       |              |              |              | 7.68 t (7.5) |                |
| 6'       |              |              |              | 7.56 t (7.5) |                |
| 7'       |              |              |              | 8.24 d (7.5) |                |
| OH-1     | 13.30 s      |              | 13.42 s      | 13.60 s      | 13.89 s        |
| OH-3     |              |              |              | 6.19 s       |                |
| OH-6     |              |              |              |              | 6.31 s         |
| OH-7     |              |              |              |              |                |
| OCOH-13  |              |              |              |              | 8.13 s         |

Data ( $\delta$ ) measured in CDCl<sub>3</sub> at 300 MHz. s = singlet, d = doublet, t = triplet, m = multiplet. *J* values presented in Hz and omitted if the signals overlapped as multiplets.

**Table S4.**  $^{13}\text{C}$  NMR Spectroscopic Data of Compounds **8, 9, 11-13**

| position | <b>8<sup>a</sup></b>               | <b>9<sup>a</sup></b>                | <b>11<sup>a</sup></b> | <b>12<sup>b</sup></b> | <b>13<sup>b</sup></b> |
|----------|------------------------------------|-------------------------------------|-----------------------|-----------------------|-----------------------|
| 1        | 161.0 C                            | 154.5 C                             | 159.9 C               | 160.9 C               | 161.1 C               |
| 2        | <sup>i</sup> 116.2 C               | 120.9 C                             | 111.6 C               | 108.8 C               | 104.0 C               |
| 3        | 154.9 C                            | 148.8 C                             | 163.4 C               | 162.4 C               | 160.9 C               |
| 4        | 100.3 CH                           | 108.9 CH                            | 88.6 CH               | 93.7 CH               | 94.2 CH               |
| 4a       | 153.7 C                            | 153.2 C                             | 155.4 C               | 154.1 C               | 154.9 C               |
| 5        | 110.6 CH                           | 110.2 CH                            | 98.2 CH               | 110.9 CH              | 103.0 CH              |
| 6        | 149.4 C                            | 148.5 C                             | 158.0 C               | 149.4 C               | 156.1 C               |
| 7        | 146.8 C                            | 146.8 C                             | 144.0 C               | 146.9 C               | 142.7 C               |
| 8        | 139.2 C                            | 139.0 C                             | 137.3 C               | 139.2 C               | 137.7 C               |
| 8a       | <sup>i</sup> 116.9 C               | 118.9 C                             | 112.2 C               | 117.2 C               | 112.3 C               |
| 9        | 182.9 C                            | 176.1 C                             | 182.0 C               | 182.5 C               | 182.2 C               |
| 9a       | 107.1 C                            | 113.6 C                             | 104.0 C               | 104.2 C               | 102.1 C               |
| 10a      | 154.1 C                            | 153.1 C                             | 155.2 C               | 155.4 C               | 154.7 C               |
| 11       | 22.3 CH <sub>2</sub>               | 23.5 CH <sub>2</sub>                | 21.4 CH <sub>2</sub>  | 21.7 CH <sub>2</sub>  | 16.3 CH <sub>2</sub>  |
| 12       | 121.3 CH                           | 123.0 CH                            | 122.3 CH              | 121.5 CH              | 32.1 CH <sub>2</sub>  |
| 13       | 132.3 C                            | 132.4 C                             | 131.8 C               | 136.3 C               | 76.3 C                |
| 14       | <sup>ii</sup> 25.7 CH <sub>3</sub> | <sup>iii</sup> 25.6 CH <sub>3</sub> | 25.8 CH <sub>3</sub>  | 26.1 CH <sub>3</sub>  | 27.0 CH <sub>3</sub>  |
| 15       | 18.2 CH <sub>3</sub>               | 18.2 CH <sub>3</sub>                | 17.8 CH <sub>3</sub>  | 18.2 CH <sub>3</sub>  | 27.0 CH <sub>3</sub>  |
| 16       | 26.5 CH <sub>2</sub>               | 26.2 CH <sub>2</sub>                | 26.2 CH <sub>2</sub>  | 26.7 CH <sub>2</sub>  | 22.2 CH <sub>2</sub>  |
| 17       | 122.6 CH                           | 123.6 CH                            | 123.3 CH              | 123.1 CH              | 41.8 CH <sub>2</sub>  |
| 18       | 132.3 C                            | 131.7 C                             | 131.7 C               | 132.4 C               | 84.0 C                |
| 19       | <sup>ii</sup> 25.8 CH <sub>3</sub> | <sup>iii</sup> 25.8 CH <sub>3</sub> | 25.9 CH <sub>3</sub>  | 26.1 CH <sub>3</sub>  | 26.6 CH <sub>3</sub>  |
| 20       | 17.8 CH <sub>3</sub>               | 17.9 CH <sub>3</sub>                | 18.2 CH <sub>3</sub>  | 18.4 CH <sub>3</sub>  | 26.6 CH <sub>3</sub>  |
| OMe-3    |                                    |                                     | 55.8 CH <sub>3</sub>  |                       |                       |
| OMe-6    |                                    |                                     | 56.0 CH <sub>3</sub>  |                       |                       |
| OMe-7    | 61.7 CH <sub>3</sub>               | 61.6 CH <sub>3</sub>                | 60.9 CH <sub>3</sub>  | 62.1 CH <sub>3</sub>  | 62.5 CH <sub>3</sub>  |
| OAc      | 167.9 C                            | 169.2 C                             |                       |                       |                       |
|          | 20.9 CH <sub>3</sub>               | 21.2 CH <sub>3</sub>                |                       |                       |                       |
| OAc      | 168.4 C                            | 168.1 C                             |                       |                       |                       |
|          | 21.0 CH <sub>3</sub>               | 21.0 CH <sub>3</sub>                |                       |                       |                       |
| OAc      |                                    | 168.0 C                             |                       |                       |                       |
|          |                                    | 21.0 CH <sub>3</sub>                |                       |                       |                       |
| 1'       |                                    |                                     |                       | 164.3 C               |                       |
| 2'       |                                    |                                     |                       | 128.9 C               |                       |
| 3'       |                                    |                                     |                       | 130.6 CH              |                       |
| 4'       |                                    |                                     |                       | 129.0 CH              |                       |
| 5'       |                                    |                                     |                       | 134.4 CH              |                       |
| 6'       |                                    |                                     |                       | 129.0 CH              |                       |
| 7'       |                                    |                                     |                       | 130.6 CH              |                       |
| OCOH-13  |                                    |                                     |                       |                       | 161.1 CH              |

<sup>a</sup>Data ( $\delta$ ) were measured in CDCl<sub>3</sub> at 75.5 MHz. <sup>b</sup>Data ( $\delta$ ) were measured in CDCl<sub>3</sub> at 100.6 MHz. <sup>i, ii, or iii</sup>: interchangeable.

**Table S5.** <sup>1</sup>H NMR Spectroscopic Data of Compounds **14**, **15**, 3-Geranyloxy-1,7-dihydroxyxanthone, 1,7-Dihydroxy-4-methoxyxanthone, and Euxanthone

| position | <b>14</b> <sup>a</sup> | <b>15</b> <sup>a</sup> | 3-geranyloxy-1,7-dihydroxyxanthone <sup>a</sup> | 1,7-dihydroxy-4-methoxyxanthone <sup>b</sup> | euxanthone <sup>c</sup> |
|----------|------------------------|------------------------|-------------------------------------------------|----------------------------------------------|-------------------------|
| 2        |                        |                        | 6.32 d (2.2)                                    | 6.73 d (9.0)                                 | 6.78 d (8.2)            |
| 3        |                        |                        |                                                 | 7.25 d (9.0)                                 | 7.72 t (8.2)            |
| 4        | 6.20 s                 | 6.37 s                 | 6.52 d (2.2)                                    |                                              | 7.02 d (8.2)            |
| 5        | 6.81 s                 | 6.71 s                 | 7.47 d (9.3)                                    | 7.54 d (9.0)                                 | 7.54 d (9.0)            |
| 6        |                        |                        | 7.37 dd (3.3, 9.3)                              | 7.33 dd (3.0, 9.0)                           | 7.45 dd (3.0, 9.0)      |
| 8        |                        |                        | 7.57 d (3.3)                                    | 7.61 d (3.0)                                 | 7.61 d (3.0)            |
| 11       | 2.66 m                 | 2.67 m                 | 4.73 d (7.0)                                    |                                              |                         |
| 12       | 1.88 m                 | 1.84 m                 | 5.49 t (7.0)                                    |                                              |                         |
| 14       | 1.35 s                 | 1.37 s                 | 1.79 s                                          |                                              |                         |
| 15       | 1.35 s                 | 1.37 s                 | 2.14 m                                          |                                              |                         |
| 16       | 3.48 m                 | 3.38 m                 | 2.14 m                                          |                                              |                         |
| 17       | 1.81 m                 | 1.80 m                 | 5.06 t (6.6)                                    |                                              |                         |
| 19       | 1.30 s                 | 1.28 s                 | 1.63 s                                          |                                              |                         |
| 20       | 1.30 s                 | 1.28 s                 | 1.59 s                                          |                                              |                         |
| OMe-3    |                        |                        |                                                 | 3.96 s                                       |                         |
| OMe-7    | 3.84 s                 | 3.80 s                 |                                                 |                                              |                         |
| OH-1     | 13.98 s                |                        | 12.90 s                                         | 12.01 s                                      | 12.72 s                 |
| OH-3     |                        | 9.56 s                 |                                                 |                                              |                         |
| OH-6     |                        | 9.21 s                 |                                                 |                                              |                         |

<sup>a</sup>Data (δ) measured in acetone-*d*<sub>6</sub> at 300 MHz. <sup>b</sup>Data (δ) measured in CDCl<sub>3</sub> at 300 MHz.

<sup>c</sup>Data (δ) measured in acetone-*d*<sub>6</sub> at 400 MHz. s = singlet, d = doublet, t = triplet, m = multiplet, dd = double doublet. *J* values presented in Hz and omitted if the signals overlapped as multiplets.

**Table S6.**  $^{13}\text{C}$  NMR Spectroscopic Data of Compounds **14**, **15**, 3-Geranyloxy-1,7-dihydroxyxanthone, 1,7-Dihydroxy-4-methoxyxanthone, and Euxanthone

| position | <b>14</b> <sup>a</sup> | <b>15</b> <sup>a</sup> | 3-geranyloxy-1,7-dihydroxyxanthone <sup>a</sup> | 1,7-dihydroxy-4-methoxyxanthone <sup>b</sup> | Euxanthone <sup>a</sup> |
|----------|------------------------|------------------------|-------------------------------------------------|----------------------------------------------|-------------------------|
| 1        | 161.8 C                | 157.6 C                | 164.3 C                                         | 154.7 C                                      | 162.8 C                 |
| 2        | 104.6 C                | 107.9 C                | 98.3 CH                                         | 108.5 CH                                     | 110.6 CH                |
| 3        | 161.7 C                | 160.9 C                | 167.2 C                                         | 120.3 CH                                     | 137.9 CH                |
| 4        | 94.5 CH                | 93.7 CH                | 93.8 CH                                         | 140.1 C                                      | 107.9 CH                |
| 4a       | 155.7 C                | 155.6 C                | 157.9 C                                         | 150.9 C                                      | 151.2 C                 |
| 5        | 102.7 CH               | 101.9 CH               | 119.9 CH                                        | 119.9 CH                                     | 120.4 CH                |
| 6        | 157.6 C                | 157.0 C                | 125.4 CH                                        | 124.8 CH                                     | 126.2 CH                |
| 7        | 144.5 C                | 144.1 C                | 150.9 C                                         | 146.0 C                                      | 154.9 C                 |
| 8        | 140.3 C                | 139.7 C                | 109.4 CH                                        | 109.1 CH                                     | 109.2 CH                |
| 8a       | 112.0 C                | 115.2 C                | 122.0 C                                         | 121.2 C                                      | 121.9 C                 |
| 9        | 183.0 C                | 176.6 C                | 181.5 C                                         | 181.9 C                                      | 183.1 C                 |
| 9a       | 103.4 C                | 105.4 C                | 104.1 C                                         | 109.2 C                                      | 108.0 C                 |
| 10a      | 156.6 C                | 155.1 C                | 155.1 C                                         | 152.1 C                                      | 157.4 C                 |
| 11       | 16.9 CH <sub>2</sub>   | 17.8 CH <sub>2</sub>   | 66.5 CH <sub>2</sub>                            |                                              |                         |
| 12       | 32.4 CH <sub>2</sub>   | 32.1 CH <sub>2</sub>   | 120.0 CH                                        |                                              |                         |
| 13       | 77.0 C                 | 79.3 C                 | 142.4 C                                         |                                              |                         |
| 14       | 27.0 CH <sub>3</sub>   | 27.0 CH <sub>3</sub>   | 16.8 CH <sub>3</sub>                            |                                              |                         |
| 15       | 27.0 CH <sub>3</sub>   | 27.0 CH <sub>3</sub>   | 40.2 CH <sub>2</sub>                            |                                              |                         |
| 16       | 23.3 CH <sub>2</sub>   | 22.7 CH <sub>2</sub>   | 27.0 CH <sub>2</sub>                            |                                              |                         |
| 17       | 45.8 CH <sub>2</sub>   | 45.6 CH <sub>2</sub>   | 124.7 CH                                        |                                              |                         |
| 18       | 70.6 C                 | 70.3 C                 | 132.3 C                                         |                                              |                         |
| 19       | 29.1 CH <sub>3</sub>   | 29.4 CH <sub>3</sub>   | 25.9 CH <sub>3</sub>                            |                                              |                         |
| 20       | 29.1 CH <sub>3</sub>   | 29.4 CH <sub>3</sub>   | 17.8 CH <sub>3</sub>                            |                                              |                         |
| OMe-3    |                        |                        |                                                 | 57.4 CH <sub>3</sub>                         |                         |
| OMe-7    | 61.7 CH <sub>3</sub>   | 61.7 CH <sub>3</sub>   |                                                 |                                              |                         |

<sup>a</sup>Data ( $\delta$ ) measured in acetone-*d*<sub>6</sub> at 100.6 MHz. <sup>b</sup>Data ( $\delta$ ) measured in CDCl<sub>3</sub> at 75.5 MHz.

### Physical data of known xanthenes isolated or derivatized from *C. cochinchinense*

**$\alpha$ -Mangostin (3):** Amorphous yellow powder (*n*-hexane) showing a purple color under UV light at 365 nm; UV (MeOH)  $\lambda_{\max}$  (log  $\epsilon$ ) 243 (4.80), 256 (4.72), 316 (4.66) nm; IR (dried film)  $\nu_{\max}$  3400, 2966, 2916, 1645, 1608, 1572, 1464, 1209, 1187, 1157, 1080, 841  $\text{cm}^{-1}$ ;  $^1\text{H}$  and  $^{13}\text{C}$  NMR data, see Tables S1 and S2; positive ESIMS  $m/z$  433.2 for  $\text{C}_{24}\text{H}_{26}\text{O}_6\text{Na}$ .

**$\gamma$ -Mangostin (4):** Amorphous yellow powder (*n*-hexane) showing a purple color under UV light at 365 nm; UV (MeOH)  $\lambda_{\max}$  (log  $\epsilon$ ) 243 (4.34), 259 (4.33), 317 (4.17) nm; IR (dried film)  $\nu_{\max}$  3387, 2924, 1644, 1615, 1460, 1284, 1196, 785  $\text{cm}^{-1}$ ;  $^1\text{H}$  and  $^{13}\text{C}$  NMR data, see Tables S1 and S2; positive ESIMS  $m/z$  419.1 for  $\text{C}_{23}\text{H}_{24}\text{O}_6\text{Na}$ .

**1,3,7-Trihydroxy-2,4-di-isoprenylxanthone (5):** Amorphous yellow powder (*n*-hexane) showing a purple color under UV light at 365 nm; UV (MeOH)  $\lambda_{\max}$  (log  $\epsilon$ ) 237 (4.49), 265 (4.49), 317 (4.16) nm; IR (dried film)  $\nu_{\max}$  3380, 2975, 2926, 1645, 1616, 1585, 1485, 1344, 1221, 1134, 1095, 804  $\text{cm}^{-1}$ ;  $^1\text{H}$  and  $^{13}\text{C}$  NMR data, see Tables S1 and S2; positive ESIMS  $m/z$  403.2 for  $\text{C}_{23}\text{H}_{24}\text{O}_5\text{Na}$ .

**Cochinchinone A (6):** Amorphous yellow powder (*n*-hexane) showing a purple color under UV light at 365 nm; UV (MeOH)  $\lambda_{\max}$  (log  $\epsilon$ ) 235 (4.65), 268 (4.65), 317 (4.31) nm; IR (dried film)  $\nu_{\max}$  3363, 2914, 1641, 1614, 1570, 1485, 1377, 1232, 1172, 1027, 820  $\text{cm}^{-1}$ ;  $^1\text{H}$  and  $^{13}\text{C}$  NMR data, see Tables S1 and S2; positive ESIMS  $m/z$  471.2 for  $\text{C}_{28}\text{H}_{32}\text{O}_5\text{Na}$ .

**3-*O*-Acetyl- $\alpha$ -mangostin (7):** Amorphous light yellow powder (*n*-hexane) showing a purple color under UV light at 365 nm; UV (MeOH)  $\lambda_{\max}$  (log  $\epsilon$ ) 236 (4.41), 252 (4.37), 308 (4.19) nm; IR (dried film)  $\nu_{\max}$  3393, 2917, 2849, 1750, 1632, 1606, 1575, 1464, 1432, 1375, 1278, 1159, 1073  $\text{cm}^{-1}$ ;  $^1\text{H}$  and  $^{13}\text{C}$  NMR data, see Tables S1 and S2; positive ESIMS  $m/z$  475.2 for  $\text{C}_{26}\text{H}_{28}\text{O}_7\text{Na}$ .

**3,6-Di-*O*-acetyl- $\alpha$ -mangostin (8):** Amorphous light yellow powder (*n*-hexane) showing a purple color under UV light at 365 nm; UV (MeOH)  $\lambda_{\text{max}}$  (log  $\epsilon$ ) 237 (4.61), 262 (4.66), 294 (4.25) nm; IR (dried film)  $\nu_{\text{max}}$  3444, 2917, 1773, 1646, 1603, 1459, 1426, 1373, 1274, 1180, 1142, 1024, 887  $\text{cm}^{-1}$ ;  $^1\text{H}$  and  $^{13}\text{C}$  NMR data, see Tables S3 and S4; positive ESIMS  $m/z$  517.1 for  $\text{C}_{28}\text{H}_{30}\text{O}_8\text{Na}$ .

**3,6,7-Tri-*O*-acetyl- $\alpha$ -mangostin (9):** Amorphous white powder (*n*-hexane) showing a purple color under UV light at 365 nm; UV (MeOH)  $\lambda_{\text{max}}$  (log  $\epsilon$ ) 242 (4.82), 262 (4.48), 294 (4.20) nm; IR (dried film)  $\nu_{\text{max}}$  2919, 2852, 1775, 1658, 1618, 1456, 1425, 1369, 1263, 1191, 1139, 1067, 896  $\text{cm}^{-1}$ ;  $^1\text{H}$  and  $^{13}\text{C}$  NMR data, see Tables S3 and S4; positive ESIMS  $m/z$  559.2 for  $\text{C}_{30}\text{H}_{32}\text{O}_9\text{Na}$ .

**3,6-Di-*O*-methyl- $\alpha$ -mangostin (11):** Amorphous yellow powder (*n*-hexane) showing a purple color under UV light at 365 nm; UV (MeOH)  $\lambda_{\text{max}}$  (log  $\epsilon$ ) 244 (4.72), 261 (4.73), 312 (4.56) nm; IR (dried film)  $\nu_{\text{max}}$  2927, 1647, 1599, 1458, 1427, 1375, 1278, 1214, 1173, 825  $\text{cm}^{-1}$ ;  $^1\text{H}$  and  $^{13}\text{C}$  NMR data, see Tables S3 and S4; positive ESIMS  $m/z$  461.3 for  $\text{C}_{26}\text{H}_{30}\text{O}_6\text{Na}$ .

**6-*O*-Benzoyl- $\alpha$ -mangostin (12):** Amorphous yellow powder (*n*-hexane) showing a purple color under UV light at 365 nm; UV (MeOH)  $\lambda_{\text{max}}$  (log  $\epsilon$ ) 241 (4.66), 311 (4.31) nm; IR (dried film)  $\nu_{\text{max}}$  3404, 2924, 1748, 1646, 1458, 1424, 1259, 1178, 1061, 1024, 770  $\text{cm}^{-1}$ ;  $^1\text{H}$  and  $^{13}\text{C}$  NMR data, see Table S3 and S4; positive ESIMS  $m/z$  537.3 for  $\text{C}_{31}\text{H}_{30}\text{O}_7\text{Na}$ .

**18-*O*-Formyl-3-isomangostin hydrate (13):** Amorphous white powder (*n*-hexane) showing a purple color under UV light at 365 nm; UV (MeOH)  $\lambda_{\text{max}}$  (log  $\epsilon$ ) 242 (4.30), 318 (4.21) nm; IR (dried film)  $\nu_{\text{max}}$  3382, 2978, 1648, 1601, 1463, 1371, 1285, 885  $\text{cm}^{-1}$ ;  $^1\text{H}$  and  $^{13}\text{C}$  NMR data, see Tables S3 and S4; positive ESIMS  $m/z$  479.1 for  $\text{C}_{25}\text{H}_{28}\text{O}_8\text{Na}$ .

**3-Isomangostin hydrate (14):** Amorphous yellow powder (*n*-hexane) showing a purple color under UV light at 365 nm; UV (MeOH)  $\lambda_{\max}$  (log  $\epsilon$ ) 243 (4.41), 317 (4.24) nm; IR (dried film)  $\nu_{\max}$  2931, 1646, 1601, 1463, 1285, 1158, 811  $\text{cm}^{-1}$ ;  $^1\text{H}$  and  $^{13}\text{C}$  NMR data, see Tables S5 and S6; positive ESIMS  $m/z$  451.2 for  $\text{C}_{24}\text{H}_{28}\text{O}_7\text{Na}$ .

**1-Isomangostin hydrate (15):** Amorphous white powder (*n*-hexane) showing a purple color under UV light at 365 nm; UV (MeOH)  $\lambda_{\max}$  (log  $\epsilon$ ) 244 (4.46), 305 (4.26) nm; IR (dried film)  $\nu_{\max}$  2929, 2854, 1651, 1625, 1597, 1459, 1368, 1275, 1157, 1088  $\text{cm}^{-1}$ ;  $^1\text{H}$  and  $^{13}\text{C}$  NMR data, see Tables S5 and S6; positive ESIMS  $m/z$  451.3 for  $\text{C}_{24}\text{H}_{28}\text{O}_7\text{Na}$

**3-Geranyloxy-1,7-dihydroxyxanthone:** Amorphous yellow powder (*n*-hexane) showing a purple color under UV light at 365 nm; UV (MeOH)  $\lambda_{\max}$  (log  $\epsilon$ ) 237 (4.38), 259 (4.52), 309 (4.12) nm; IR (dried film)  $\nu_{\max}$  3383, 2922, 1653, 1610, 1575, 1488, 1301, 1165, 1080, 791  $\text{cm}^{-1}$ ;  $^1\text{H}$  and  $^{13}\text{C}$  NMR data, see Tables S5 and S6; positive ESIMS  $m/z$  403.2 for  $\text{C}_{23}\text{H}_{24}\text{O}_5\text{Na}$ .

**1,7-Dihydroxy-4-methoxyxanthone:** Amorphous yellow powder (*n*-hexane) showing a purple color under UV light at 365 nm; UV (MeOH)  $\lambda_{\max}$  (log  $\epsilon$ ) 236 (4.18), 267 (4.20) nm; IR (dried film)  $\nu_{\max}$  3362, 1651, 1608, 1582, 1489, 1363, 1284, 1237, 1176, 1086, 1046, 810  $\text{cm}^{-1}$ ;  $^1\text{H}$  and  $^{13}\text{C}$  NMR data, see Tables S5 and S6; positive ESIMS  $m/z$  281.1 for  $\text{C}_{14}\text{H}_{10}\text{O}_5\text{Na}$ .

**Euxanthone:** Amorphous yellow powder (*n*-hexane) showing a purple color under UV light at 365 nm; UV (MeOH)  $\lambda_{\max}$  (log  $\epsilon$ ) 235 (4.95), 259 (5.05) nm; IR (dried film)  $\nu_{\max}$  3351, 1645, 1609, 1476, 1361, 1234, 1048, 829  $\text{cm}^{-1}$ ;  $^1\text{H}$  and  $^{13}\text{C}$  NMR data, see Tables S5 and S6; positive ESIMS  $m/z$  251.1 for  $\text{C}_{13}\text{H}_8\text{O}_4\text{Na}$ .

## Evaluation of 3,6-di-*O*-acetyl- $\alpha$ -mangostin (8) in an in vivo hollow fiber assay

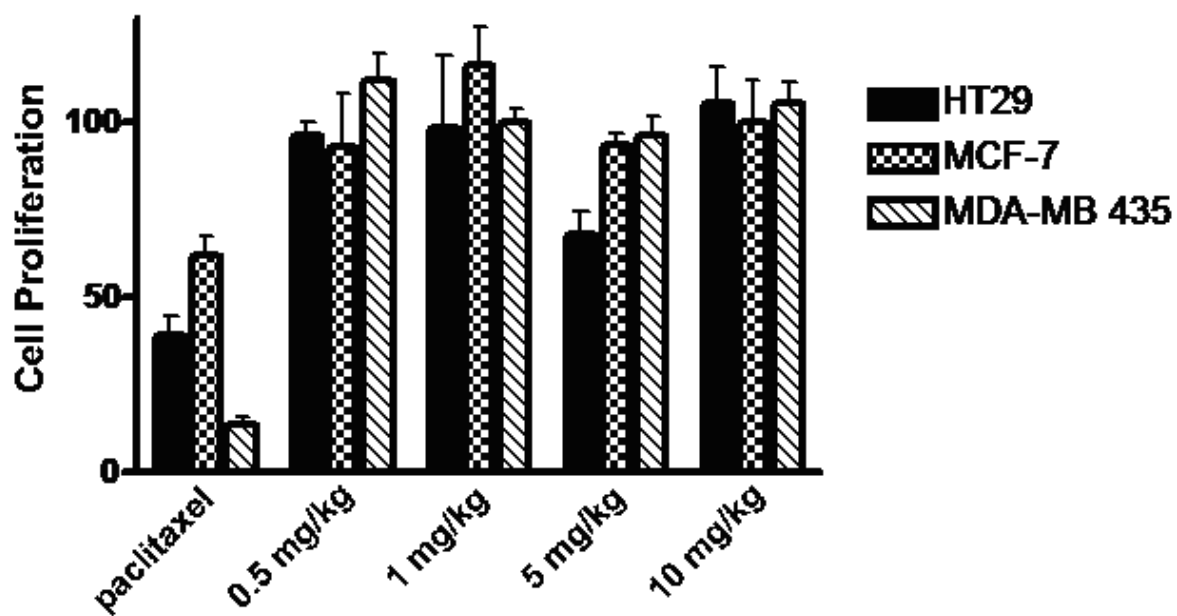

Supplement: NIHMS283592-supplement-1_si_001.pdf [file NIHMS283592-supplement-1_si_001.pdf]
